# Supplementary material for: Boron-doped scandium clusters B@Scn−1−/0/+ with n = 2–13: uncovering the smallest endohedrally doped cages
Source: Royal Society of Chemistry journal article supplement (doi:10.1039/d4ra06541g), 2024-01-01
Supplement: d4ra06541g1.pdf [file d4ra06541g1.pdf]

## **Supplementary Information File**

### **The Boron-doped Scandium Clusters $B@Sc_n^{-/0/+}$ with $n = 2-13$ :**

### **Uncovering the Smallest Endohedrally Doped Cages**

**Bao-Ngan Nguyen-Ha,<sup>1,2</sup> Nguyen Minh Tam,<sup>3</sup> My Phuong Pham-Ho,<sup>1,2,\*</sup> Minh Tho Nguyen<sup>4,5</sup>**

<sup>1</sup> Faculty of Chemical Engineering, Ho Chi Minh City University of Technology (HCMUT), 268 Ly Thuong Kiet Street, District 10, Ho Chi Minh City, Vietnam. Email: nhbngan.sdh232@hcmut.edu.vn, phmpuong@hcmut.edu.vn

<sup>2</sup> Vietnam National University Ho Chi Minh City, Linh Trung Ward, Thu Duc City, Ho Chi Minh City, Vietnam

<sup>3</sup> Faculty of Basic Sciences, University of Phan Thiet, 225 Nguyen Thong, Phan Thiet City, Binh Thuan, Vietnam

<sup>4</sup> Laboratory for Chemical Computation and Modeling, Institute for Computational Science and Artificial Intelligence, Van Lang University, Ho Chi Minh City, Vietnam

<sup>5</sup> Faculty of Applied Technology, School of Technology, Van Lang University, Ho Chi Minh City, Vietnam

## Content

- Electronic structure and HOMO-LUMO gap (eV) of the Sc<sub>3</sub> trimer at <sup>2</sup>A<sub>1</sub>' state computed using the PBE, B3PW91, PB86, TPSSh and M05 functionals with the def2-TZVP basis set (Table S1).
- The Structures, Multiplicities (M, in bracket) and Relative Energies (rE, kcal.mol<sup>-1</sup>) of the lowest-lying Sc<sub>n</sub><sup>+0/-</sup> (n = 2-13) clusters calculated at the PBE/ Def2-TZVP theory method (Figure S1).
- The molecular orbital (MO) diagram of the Sc<sub>6</sub><sup>+0/-</sup>, B@Sc<sub>6</sub><sup>+0/-</sup> and Sc<sub>11</sub><sup>+0/-</sup> at different spin states (Figures S2-S7).
- Calculated density of states (DOS) for the lowest-lying neutral clusters of the Sc<sub>6</sub>, Sc<sub>7</sub>, B@Sc<sub>6</sub> and B@Sc<sub>7</sub> isomers (Figures S8 and S9).
- Coordinates of the lowest-lying Sc<sub>n</sub><sup>+0/-</sup> and Sc<sub>n-1</sub>B<sup>+0/-</sup> (n = 2-13) clusters (Pages 12-25).

**Table S1.** Electronic structure and HOMO-LUMO gap (eV) of the Sc<sub>3</sub> trimer at <sup>2</sup>A<sub>1</sub>' state computed using the PBE, B3PW91, PB86, TPSSh and M05 functionals with the def2-TZVP basis set.

| Functional | Electronic structure                            | HOMO-LUMO gap (eV) |      |
|------------|-------------------------------------------------|--------------------|------|
|            |                                                 | Alpha              | Beta |
| PBE        | 1S <sup>2</sup> 1P <sup>6</sup> 2S <sup>1</sup> | 0.66               | 0.42 |
| B3PW91     | 1S <sup>2</sup> 1P <sup>6</sup> 2S <sup>1</sup> | 2.07               | 1.81 |
| BP86       | 1S <sup>2</sup> 1P <sup>6</sup> 2S <sup>1</sup> | 0.68               | 0.43 |
| TPSSh      | 1S <sup>2</sup> 1P <sup>6</sup> 2S <sup>1</sup> | 1.52               | 1.19 |
| M05        | 1S <sup>2</sup> 1P <sup>6</sup> 2S <sup>1</sup> | 2.50               | 1.89 |

| n  | Cation                                                                                     |                                                  |                                                                                   |                                               | Neutral                                                                                    |                                                   |                                                                                   |                                               | Anion                                                                                        |                                                   |                                                                                     |                                              |
|----|--------------------------------------------------------------------------------------------|--------------------------------------------------|-----------------------------------------------------------------------------------|-----------------------------------------------|--------------------------------------------------------------------------------------------|---------------------------------------------------|-----------------------------------------------------------------------------------|-----------------------------------------------|----------------------------------------------------------------------------------------------|---------------------------------------------------|-------------------------------------------------------------------------------------|----------------------------------------------|
|    | Structure                                                                                  | (M) - rE                                         | Structure                                                                         | (M) - rE                                      | Structure                                                                                  | (M) - rE                                          | Structure                                                                         | (M) - rE                                      | Structure                                                                                    | (M) - rE                                          | Structure                                                                           | (M) - rE                                     |
| 2  |  c.2.A.1  | (4) 0.00<br>(2) 6.17<br>(6) 10.15                |                                                                                   |                                               |  n.2.A.1  | (5) 0.00<br>(3) 3.86<br>(1) 8.95                  |                                                                                   |                                               |  a.2.A.1  | (4) 0.00<br>(6) 3.75<br>(2) 6.87                  |                                                                                     |                                              |
| 3  |  c.3.A.1  | (3) 0.00<br>(7) 0.85<br>(5) 1.02                 |                                                                                   |                                               |  n.3.A.1  | (2) 0.00<br>(4) 5.34<br>(6) 6.37                  |                                                                                   |                                               |  a.3.A.1  | (1) 0.00<br>(3) 5.00<br>(5) 5.38                  |                                                                                     |                                              |
| 4  |  c.4.A.1  | (2) 0.00<br>(4) 4.71<br>(6) 5.79                 |                                                                                   |                                               |  n.4.A.1  | (3) 0.00<br>(1) 5.76<br>(5) 6.22                  |                                                                                   |                                               |  a.4.A.1  | (4) 0.00<br>(2) 2.40<br>(6) 8.25                  |                                                                                     |                                              |
| 5  |  c.5.A.1  | (5) 0.00<br>(3) 1.29<br>(1) 3.04<br>(7) 3.94     |                                                                                   |                                               |  n.5.A.1  | (6) 0.00<br>(4) 0.10<br>(2) 0.12<br>(8) 0.27      |                                                                                   |                                               |  a.5.A.1  | (7) 0.00<br>(5) 1.35<br>(3) 2.38<br>(1) 5.74      |  | (7) 11.18<br>(5) 14.42                       |
| 6  |  c.6.A.1  | (6) 0.00<br>(4) 2.81<br>(8) 2.95<br>(2) 4.53     |  | (6) 9.07<br>(4) 9.35                          |  n.6.A.1  | (7) 0.00<br>(5) 0.11<br>(3) 1.95<br>(9) 2.04      |  | (5) 10.28                                     |  a.6.A.1  | (6) 0.00<br>(8) 0.02<br>(4) 0.91<br>(2) 3.03      |  | (6) 2.58<br>(4) 2.68                         |
| 7  |  c.7.A.1  | (7) 0.00<br>(5) 0.96<br>(3) 1.29<br>(9) 1.65     |  | (5) 9.47                                      |  n.7.A.1  | (2) 0.00<br>(4) 1.89<br>(6) 2.05<br>(8) 2.13      |  | (4) 0.45                                      |  a.7.A.1  | (3) 0.00<br>(5) 1.04<br>(7) 1.98<br>(1) 5.72      |  | (3) 11.41                                    |
| 8  |  c.8.A.1  | (4) 0.00<br>(2) 0.03<br>(6) 0.76<br>(8) 1.44     |  | (2) 8.20<br>(4) 8.28                          |  n.8.A.1  | (5) 0.00<br>(3) 1.05<br>(7) 2.00<br>(1) 7.12      |  | (3) 8.90<br>(5) 9.76                          |  a.8.A.1  | (2) 0.00<br>(6) 0.68<br>(4) 0.81<br>(8) 2.71      |                                                                                     |                                              |
| 9  |  c.9.A.1  | (3) 0.00<br>(5) 0.55                             |  | (11) 0.81<br>(9) 0.88<br>(5) 0.88<br>(7) 1.45 |  n.9.A.1  | (2) 0.00<br>(4) 0.53<br>(6) 0.77                  |  | (10) 0.36<br>(4) 1.61<br>(6) 1.83<br>(8) 1.96 |  a.9.A.1  | (3) 0.00<br>(7) 0.35<br>(5) 0.48<br>(9) 2.36      |  | (9) 0.96<br>(7) 2.41<br>(5) 2.53<br>(3) 2.98 |
| 10 |  c.10.A.1 | (8) 0.00<br>(10) 0.80<br>(6) 1.82                |  | (2) 1.94<br>(4) 2.26<br>(6) 2.64              |  n.10.A.1 | (5) 0.00<br>(3) 0.92<br>(7) 1.43                  |  | (13) 0.11<br>(11) 0.49<br>(9) 2.80            |  a.10.A.1 | (14) 0.00<br>(12) 1.68<br>(10) 2.40               |  | (4) 0.40<br>(2) 0.89<br>(6) 1.88             |
| 11 |  c.11.A.1 | (3) 0.00<br>(11) 0.37<br>(13) 0.56<br>(5) 1.34   |  | (13) 1.13<br>(11) 2.98<br>(7) 6.42            |  n.11.A.1 | (2) 0.00<br>(4) 0.27<br>(6) 0.49<br>(8) 1.45      |  | (12) 1.95<br>(10) 2.69                        |  a.11.A.1 | (3) 0.00<br>(5) 0.01<br>(1) 2.30<br>(7) 3.29      |  | (11) 1.90<br>(9) 4.17                        |
| 12 |  c.12.A.1 | (14) 0.00<br>(16) 0.34<br>(12) 1.45<br>(10) 1.47 |  | (8) 1.45<br>(6) 0.09<br>(10) 4.38             |  n.12.A.1 | (13) 0.00<br>(17) 0.36<br>(15) 0.51<br>(7) 1.21   |  | (7) 2.41<br>(9) 2.45                          |  a.12.A.1 | (12) 0.00<br>(14) 0.29<br>(16) 1.82<br>(6) 2.77   |  | (8) 2.62<br>(10) 0.67                        |
| 13 |  c.13.A.1 | (19) 0.00<br>(17) 4.44<br>(21) 10.16             |                                                                                   |                                               |  n.13.A.1 | (20) 0.00<br>(18) 5.33<br>(16) 9.48<br>(22) 20.80 |                                                                                   |                                               |  a.13.A.1 | (19) 0.00<br>(21) 4.29<br>(17) 4.00<br>(23) 23.66 |                                                                                     |                                              |

**Figure S2:** The Structures, Multiplicities (M, in bracket) and Relative Energies (rE, kcal.mol<sup>-1</sup>) of the lowest-lying Sc<sub>n</sub><sup>+0/-</sup> (n = 2-13) clusters calculated at the PBE/ Def2-TZVP theory method.

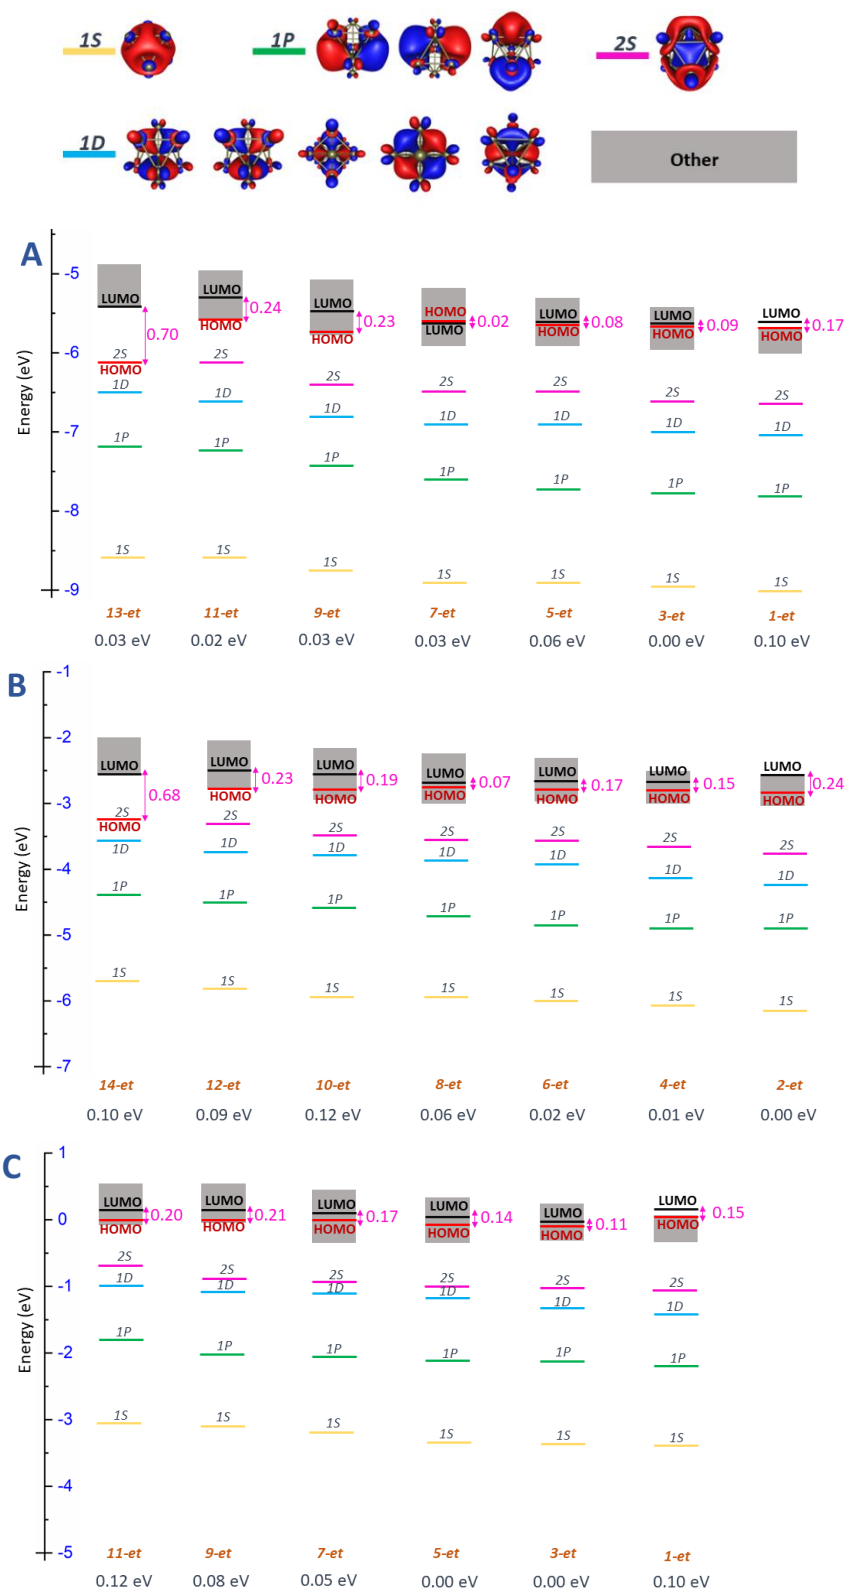

**Figure S2:** The molecular orbital (MO) diagram illustrates the beta side (excluding the singlet state) of the cationic (A), neutral (B), and anionic (C) Sc<sub>11</sub> clusters across different spin states. This analysis was calculated using the PBE/Def2-TZVP method.

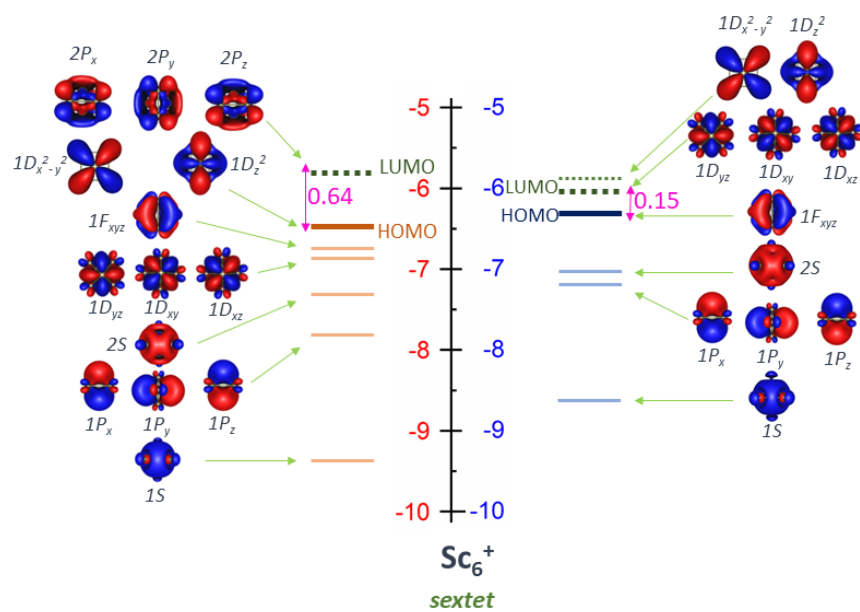

**Figure S3:** Molecular orbital (MO) diagram of cationic  $\text{Sc}_6^+$  cluster at sextet spin state, using the PBE/ Def2-TZVP theory method. Left and right sides denote alpha and beta, respectively.

A

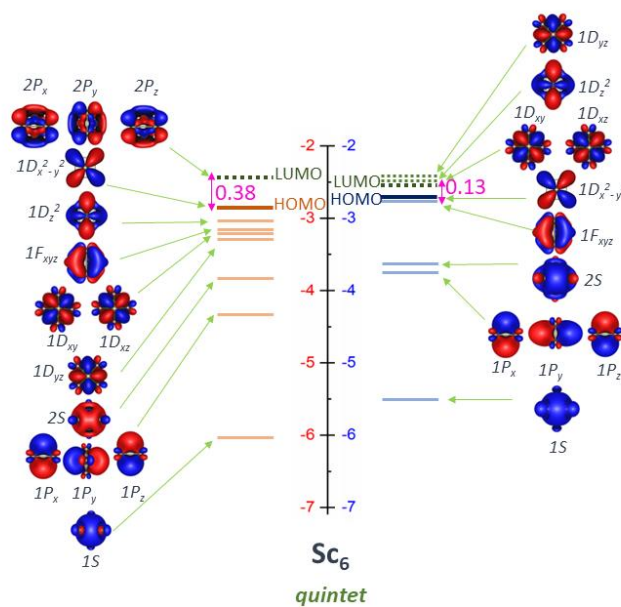

B

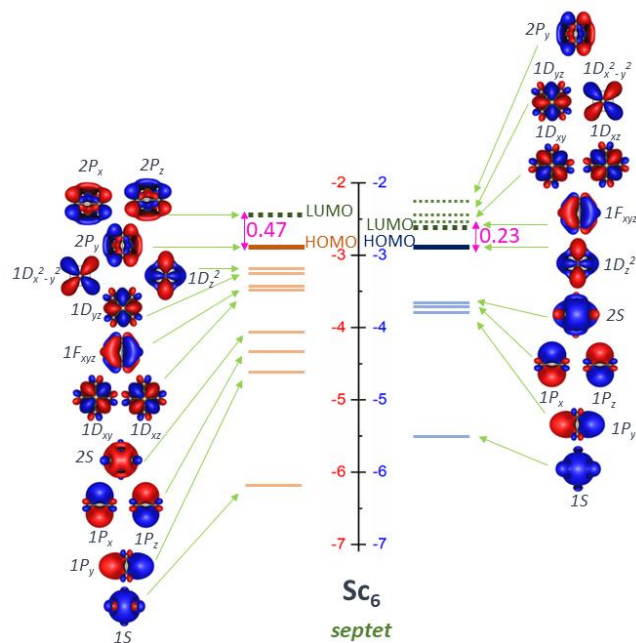

**Figure S4:** Molecular orbital (MO) diagram of neutral  $\text{Sc}_6$  cluster at (A) quintet spin state and (B) septet spin state, using the PBE/Def2-TZVP theory method. Left and right sides denote alpha and beta, respectively.

A

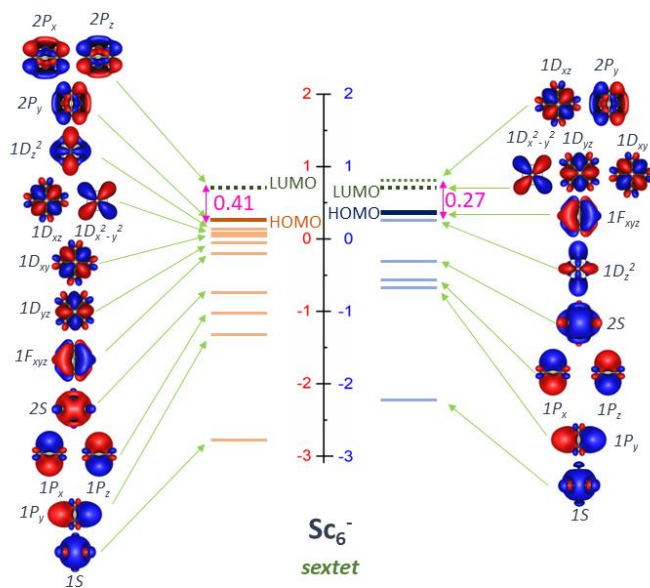

B

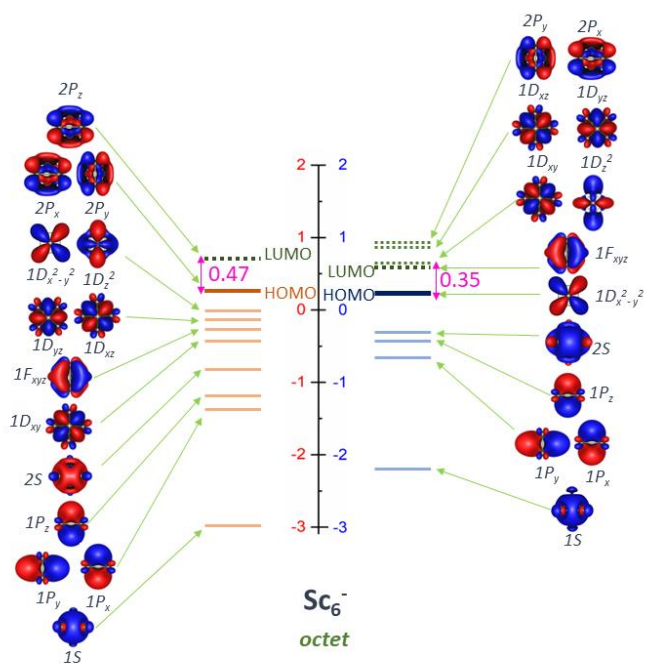

**Figure S5:** Molecular orbital (MO) diagram of anionic  $\text{Sc}_6^-$  cluster at (A) sextet spin state and (B) octet spin state, using the PBE/Def2-TZVP theory method. Left and right sides denote alpha and beta, respectively.



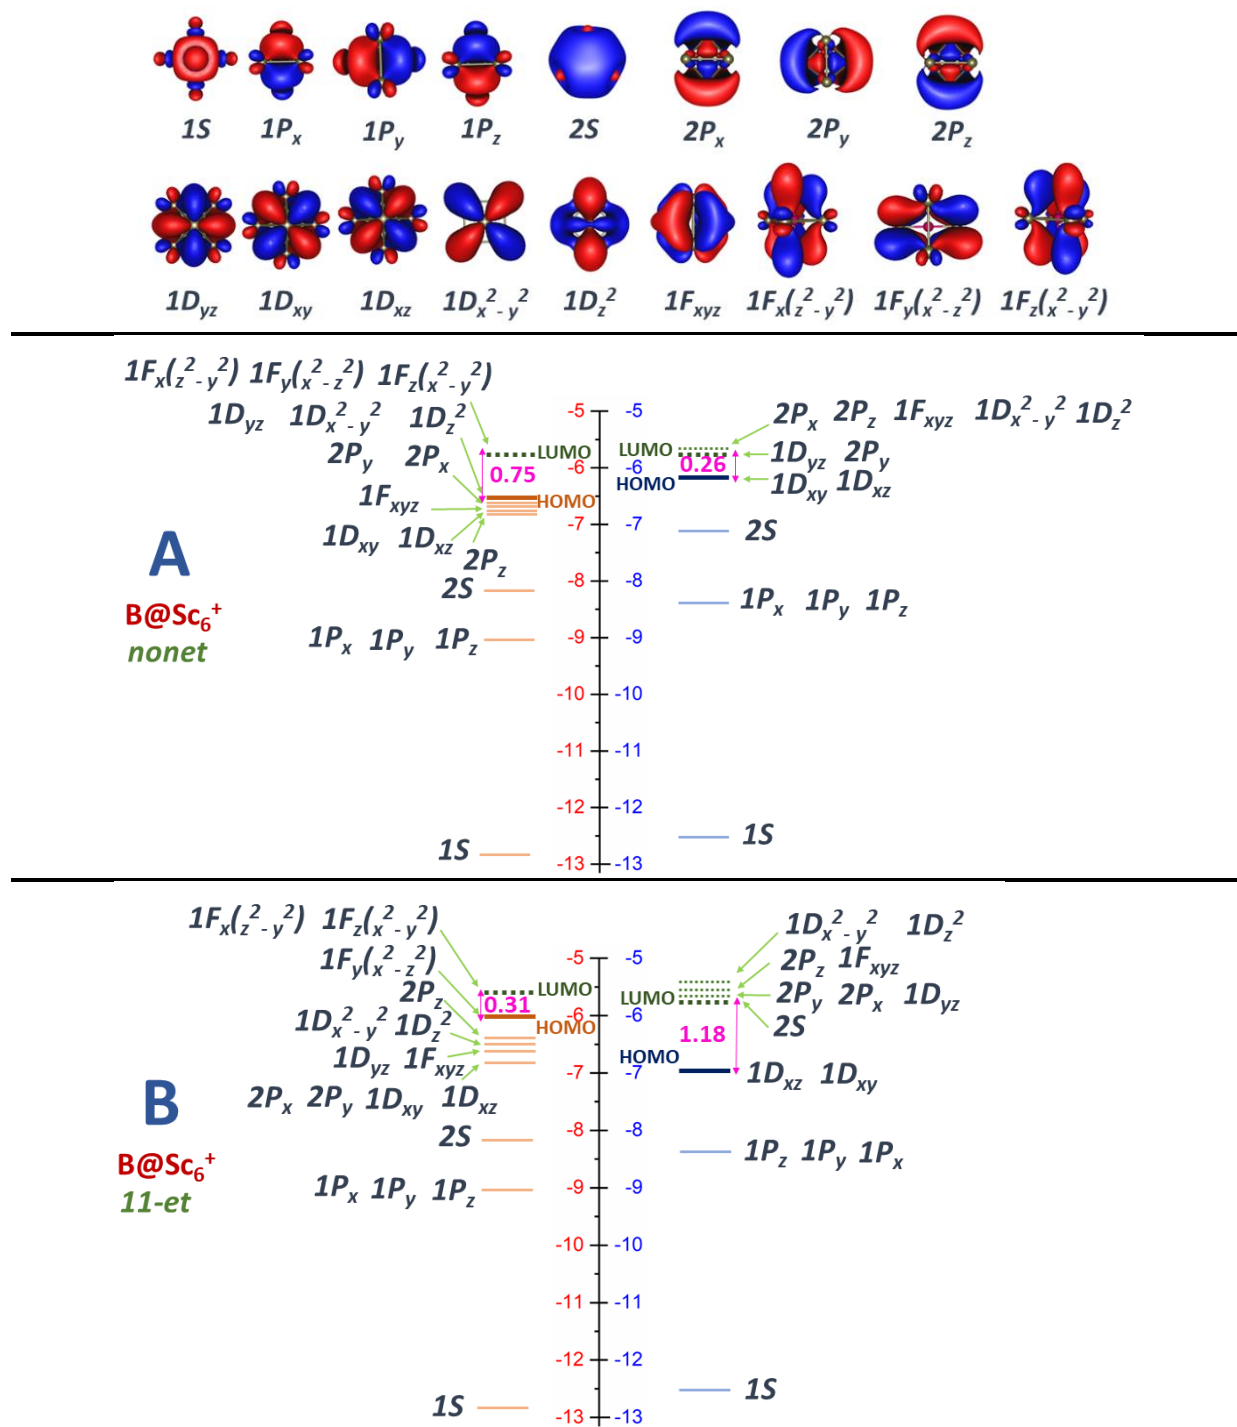

**Figure S6:** Molecular orbital (MO) diagram of cationic B@Sc<sub>6</sub><sup>+</sup> cluster at **A**: a nonet spin state and **B**: a 11-et spin state, using the PBE/Def2-TZVP method. Left and right sides denote alpha and beta electrons, respectively.

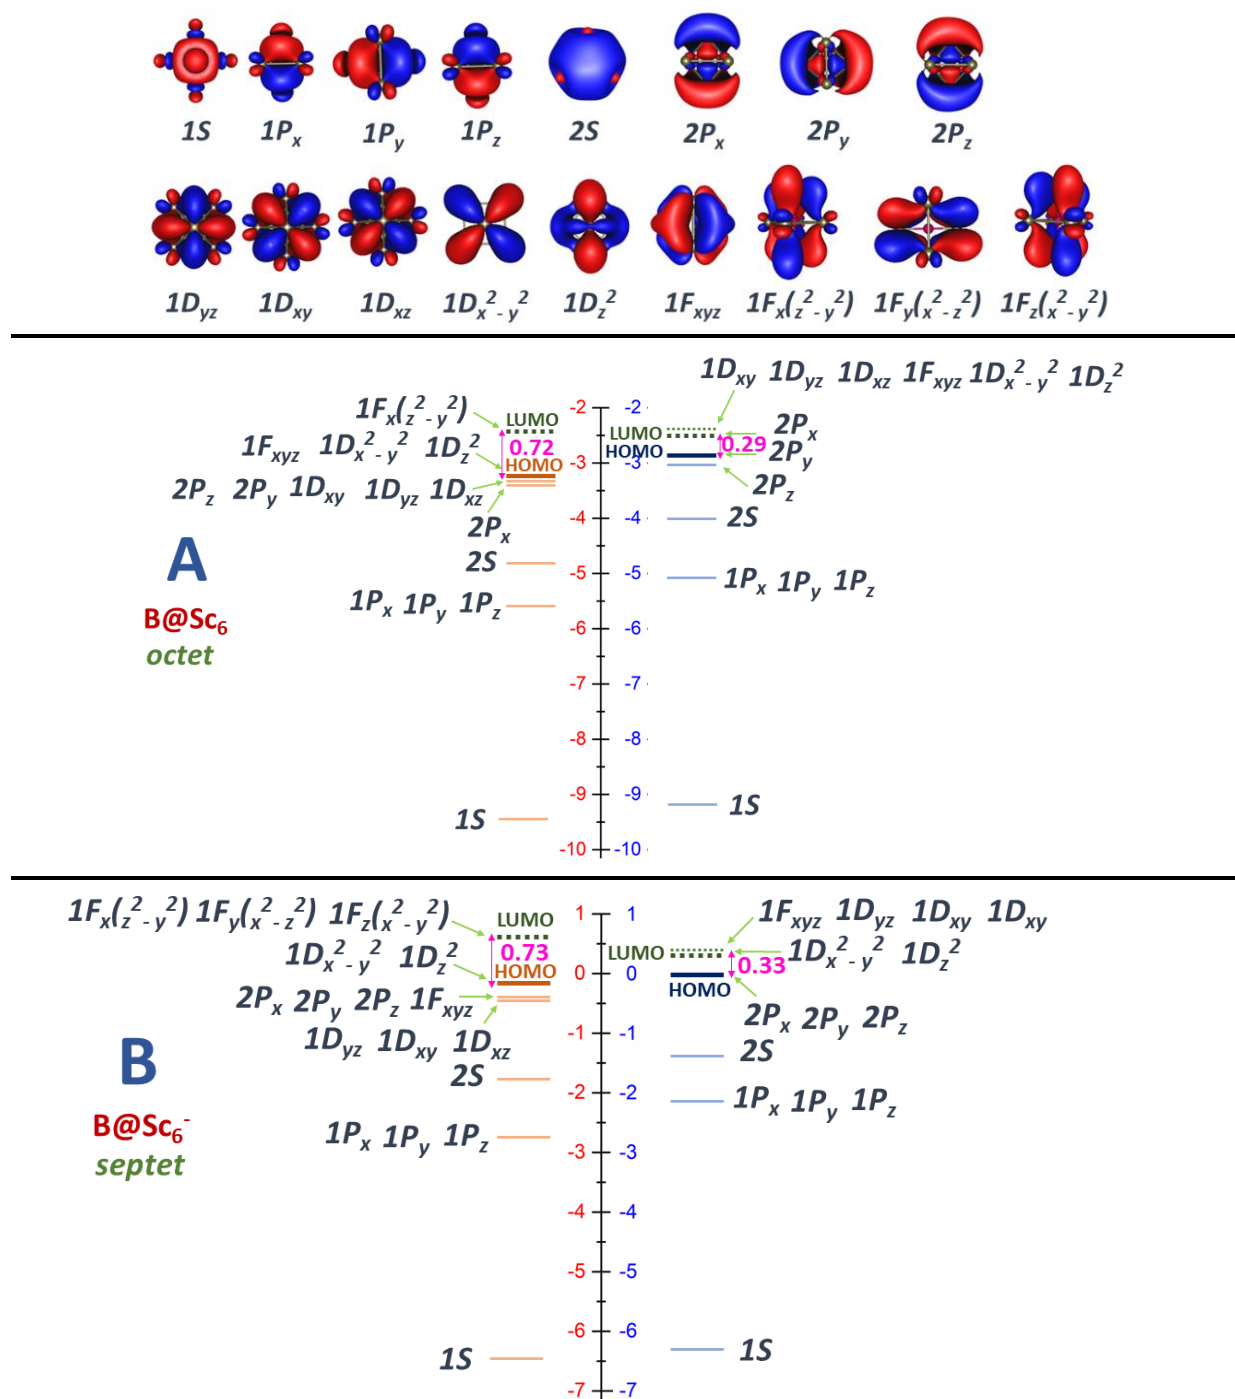

**Figure S7:** Molecular orbital (MO) diagram of **A:** neutral B@Sc<sub>6</sub> cluster at an octet spin state, and **B:** an anionic B@Sc<sub>6</sub><sup>-</sup> at septet spin state, using the PBE/ Def2-TZVP method. Left and right sides denote alpha and beta electrons, respectively.

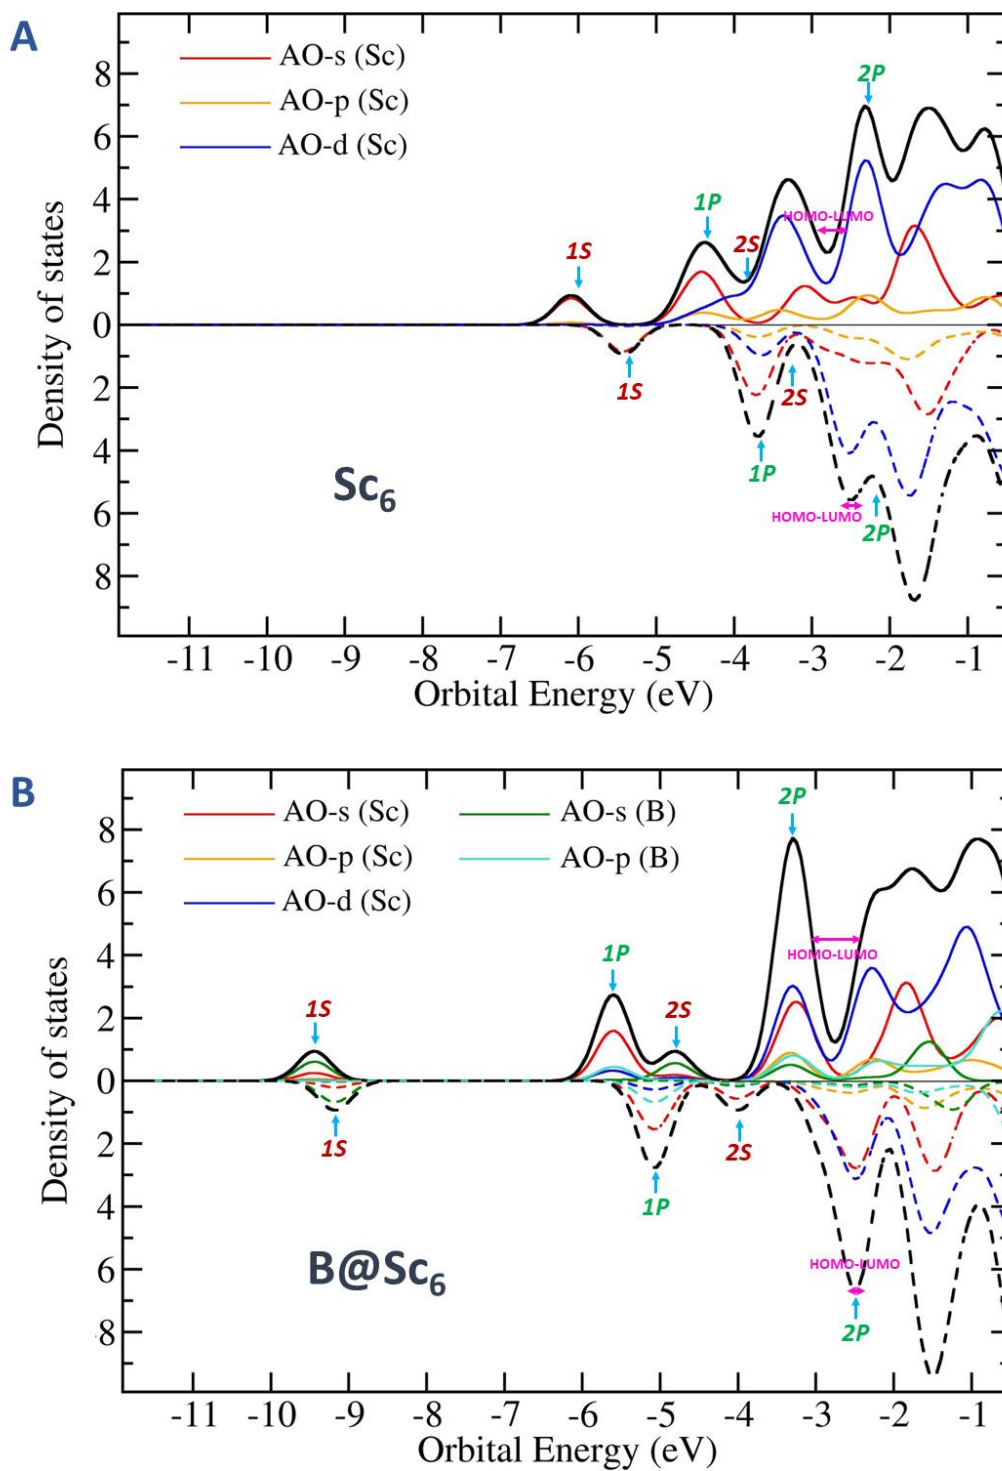

**Figure S8.** Calculated density of states (DOS) for the lowest-lying neutral clusters of (A)  $\text{Sc}_6$ , and (B)  $\text{B@Sc}_6$ . Positive and negative DOS represent spin-up and spin-down electrons, respectively.

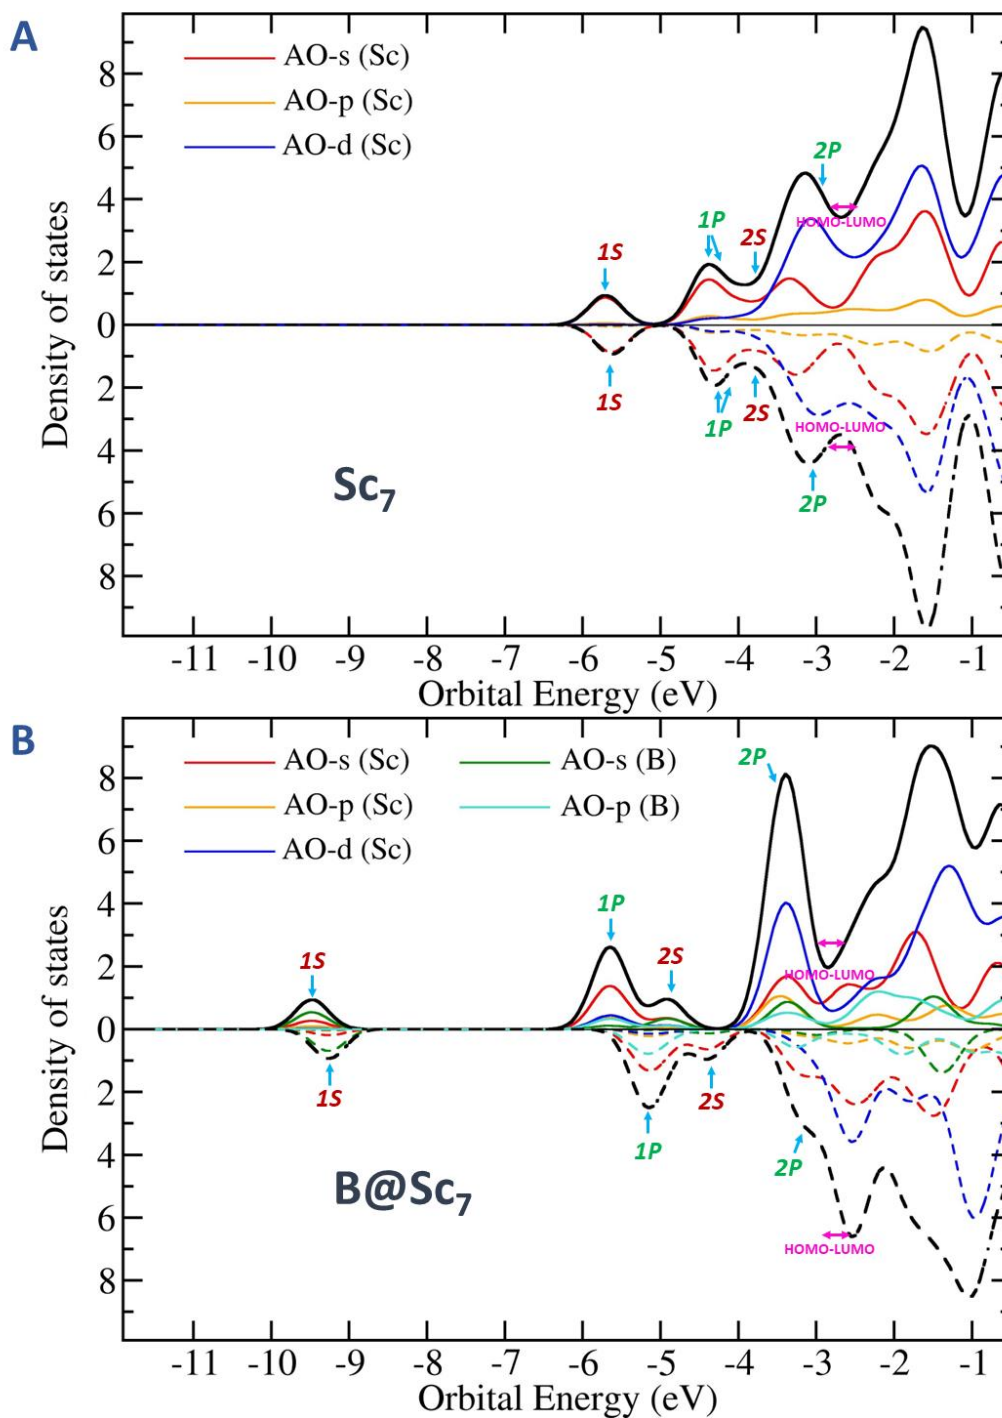

**Figure S9.** Calculated density of states (DOS) for the lowest-lying neutral clusters of (A)  $\text{Sc}_7$ , and (B)  $\text{B@Sc}_7$ .

Positive and negative DOS represent spin-up and spin-down electrons, respectively.

**Coordinates of the lowest-lying  $Sc_n^{+/0/-}$  clusters.**

| Isomer         | Spin state | Coordinate |             |             |              |
|----------------|------------|------------|-------------|-------------|--------------|
| <b>c.2.A.1</b> | quartet    | 21         | 0.000000000 | 0.000000000 | 1.280819000  |
|                |            | 21         | 0.000000000 | 0.000000000 | -1.280819000 |
| <b>n.2.A.1</b> | quintet    | 21         | 0.000000000 | 0.000000000 | 1.309529000  |
|                |            | 21         | 0.000000000 | 0.000000000 | -1.309529000 |
| <b>a.2.A.1</b> | quartet    | 21         | 0.000000000 | 0.000000000 | 1.354342000  |
|                |            | 21         | 0.000000000 | 0.000000000 | -1.354342000 |

| Isomer         | Spin state | Coordinate |              |              |              |
|----------------|------------|------------|--------------|--------------|--------------|
| <b>c.3.A.1</b> | triplet    | 21         | 1.410456000  | 0.888705000  | 0.000000000  |
|                |            | 21         | -1.410456000 | 0.674886000  | 0.000000000  |
|                |            | 21         | 0.000000000  | -1.563591000 | 0.000000000  |
| <b>n.3.A.1</b> | doublet    | 21         | 0.000000000  | 1.635733000  | 0.000000000  |
|                |            | 21         | 1.416586000  | -0.817866000 | 0.000000000  |
|                |            | 21         | -1.416586000 | -0.817866000 | 0.000000000  |
| <b>a.3.A.1</b> | singlet    | 21         | 0.000000000  | -1.386889000 | -0.800785000 |
|                |            | 21         | 0.000000000  | 0.000000000  | 1.601569000  |
|                |            | 21         | 0.000000000  | 1.386889000  | -0.800785000 |

| Isomer         | Spin state | Coordinate |              |              |              |
|----------------|------------|------------|--------------|--------------|--------------|
| <b>c.4.A.1</b> | doublet    | 21         | -0.057253000 | -1.441045000 | 1.045581000  |
|                |            | 21         | -1.490573000 | 0.020313000  | -1.001783000 |
|                |            | 21         | 0.054736000  | 1.511107000  | 0.951069000  |
|                |            | 21         | 1.493090000  | -0.090375000 | -0.994867000 |
| <b>n.4.A.1</b> | triplet    | 21         | -0.894903000 | 1.203244000  | -0.954750000 |
|                |            | 21         | -1.203033000 | -0.894969000 | 0.954919000  |
|                |            | 21         | 1.203181000  | 0.894677000  | 0.954990000  |
|                |            | 21         | 0.894756000  | -1.202953000 | -0.955160000 |
| <b>a.4.A.1</b> | quartet    | 21         | -1.280137000 | -0.487786000 | 1.146058000  |
|                |            | 21         | -0.699579000 | 1.054650000  | -1.260314000 |
|                |            | 21         | 1.277846000  | 0.887612000  | 0.877168000  |
|                |            | 21         | 0.701870000  | -1.454475000 | -0.762912000 |

| Isomer         | Spin state | Coordinate |              |              |              |
|----------------|------------|------------|--------------|--------------|--------------|
| <b>c.5.A.1</b> | quintet    | 21         | -0.075095000 | -1.500133000 | -0.843198000 |
|                |            | 21         | 0.147886000  | 0.005500000  | 1.729327000  |
|                |            | 21         | -0.075387000 | 1.494754000  | -0.852614000 |
|                |            | 21         | 2.390101000  | -0.000224000 | -0.096985000 |
|                |            | 21         | -2.387506000 | 0.000103000  | 0.063470000  |
| <b>n.5.A.1</b> | sextet     | 21         | -0.000007000 | 0.870284000  | 1.507355000  |
|                |            | 21         | 2.327919000  | 0.000051000  | 0.000000000  |
|                |            | 21         | -0.000007000 | -1.740660000 | 0.000000000  |
|                |            | 21         | -0.000007000 | 0.870284000  | -1.507355000 |
|                |            | 21         | -2.327899000 | 0.000041000  | 0.000000000  |
| <b>a.5.A.1</b> | septet     | 21         | 0.000000000  | 1.498123000  | -0.865011000 |
|                |            | 21         | 0.000000000  | 0.000000000  | 1.729959000  |
|                |            | 21         | -2.388117000 | 0.000000000  | 0.000032000  |
|                |            | 21         | 2.388117000  | 0.000000000  | 0.000032000  |
|                |            | 21         | 0.000000000  | -1.498123000 | -0.865011000 |

| Isomer         | Spin state | Coordinate |              |              |              |
|----------------|------------|------------|--------------|--------------|--------------|
| <b>c.6.A.1</b> | sextet     | 21         | -0.017946000 | -0.000016000 | 2.129820000  |
|                |            | 21         | -0.017946000 | -0.000016000 | -2.129820000 |
|                |            | 21         | -0.017946000 | 2.129866000  | 0.000000000  |
|                |            | 21         | 2.118795000  | 0.000012000  | 0.000000000  |
|                |            | 21         | -0.017925000 | -2.129783000 | 0.000000000  |
|                |            | 21         | -2.047031000 | -0.000063000 | 0.000000000  |
| <b>n.6.A.1</b> | septet     | 21         | -0.000043000 | -2.006274000 | -0.321191000 |
|                |            | 21         | 0.000058000  | -0.321016000 | 2.005706000  |
|                |            | 21         | 0.000853000  | 2.006239000  | 0.320759000  |
|                |            | 21         | -0.000624000 | 0.321052000  | -2.006070000 |
|                |            | 21         | 2.289598000  | -0.000346000 | 0.000036000  |
|                |            | 21         | -2.289842000 | 0.000344000  | 0.000759000  |
| <b>a.6.A.1</b> | octet      | 21         | -2.213433000 | 0.177547000  | -0.000537000 |
|                |            | 21         | -0.177675000 | -2.213095000 | -0.000515000 |
|                |            | 21         | 2.213387000  | -0.177690000 | 0.000363000  |
|                |            | 21         | 0.000616000  | 0.000482000  | -1.915090000 |
|                |            | 21         | 0.177606000  | 2.213176000  | 0.000337000  |
|                |            | 21         | -0.000502000 | -0.000419000 | 1.915442000  |

| Isomer         | Spin state | Coordinate |              |              |              |
|----------------|------------|------------|--------------|--------------|--------------|
| <b>c.7.A.1</b> | septet     | 21         | 0.000018000  | -0.001250000 | 1.487865000  |
|                |            | 21         | 2.516477000  | 0.781278000  | 0.000000000  |
|                |            | 21         | -2.516097000 | 0.783307000  | 0.000000000  |
|                |            | 21         | 1.583411000  | -2.069166000 | 0.000000000  |
|                |            | 21         | 0.000018000  | 2.575290000  | 0.000000000  |
|                |            | 21         | 0.000018000  | -0.001250000 | -1.487865000 |
|                |            | 21         | -1.583846000 | -2.068210000 | 0.000000000  |
| <b>n.7.A.1</b> | doublet    | 21         | -0.000025000 | -0.014502000 | 1.392309000  |
|                |            | 21         | 1.561150000  | 2.090945000  | 0.000000000  |
|                |            | 21         | -2.514819000 | -0.780583000 | 0.000000000  |
|                |            | 21         | -0.000025000 | -2.591365000 | 0.000000000  |
|                |            | 21         | -1.560806000 | 2.091232000  | 0.000000000  |
|                |            | 21         | -0.000025000 | -0.014502000 | -1.392309000 |
|                |            | 21         | 2.514551000  | -0.781225000 | 0.000000000  |
| <b>a.7.A.1</b> | triplet    | 21         | 0.000112000  | 0.039048000  | -1.415564000 |
|                |            | 21         | 0.004576000  | 2.590815000  | 0.000023000  |
|                |            | 21         | 1.531525000  | -2.104570000 | -0.000004000 |
|                |            | 21         | -1.538923000 | -2.099317000 | 0.000000000  |
|                |            | 21         | 2.515648000  | 0.763260000  | 0.000003000  |
|                |            | 21         | 0.000088000  | 0.039006000  | 1.415553000  |
|                |            | 21         | -2.513026000 | 0.771757000  | -0.000012000 |

| Isomer         | Spin state | Coordinate |              |              |              |
|----------------|------------|------------|--------------|--------------|--------------|
| <b>c.8.A.1</b> | quartet    | 21         | 2.528274000  | 1.493759000  | -0.000017000 |
|                |            | 21         | -0.685474000 | 2.039759000  | -0.000008000 |
|                |            | 21         | 0.591024000  | -0.001777000 | -1.672276000 |
|                |            | 21         | -2.416960000 | 0.013070000  | -1.489378000 |
|                |            | 21         | 0.591030000  | -0.001757000 | 1.672277000  |
|                |            | 21         | -2.416953000 | 0.013098000  | 1.489384000  |
|                |            | 21         | 2.519846000  | -1.498394000 | 0.000014000  |
|                |            | 21         | -0.710787000 | -2.057758000 | 0.000005000  |
| <b>n.8.A.1</b> | quintet    | 21         | -1.581348000 | -0.616825000 | 0.000000000  |
|                |            | 21         | -1.496533000 | 2.413975000  | 0.000000000  |
|                |            | 21         | 0.000008000  | -2.514580000 | 1.551717000  |
|                |            | 21         | 0.000008000  | 0.717449000  | 2.063203000  |
|                |            | 21         | 0.000008000  | -2.514580000 | -1.551717000 |
|                |            | 21         | 0.000008000  | 0.717449000  | -2.063203000 |
|                |            | 21         | 1.581317000  | -0.616783000 | 0.000000000  |
|                |            | 21         | 1.496533000  | 2.413895000  | 0.000000000  |
| <b>a.8.A.1</b> | doublet    | 21         | 2.496787000  | 1.566063000  | 0.000050000  |
|                |            | 21         | 0.568339000  | 0.000184000  | -1.589558000 |
|                |            | 21         | 0.568690000  | -0.000181000 | 1.589680000  |
|                |            | 21         | -0.660414000 | -2.106979000 | -0.000028000 |
|                |            | 21         | -0.660350000 | 2.106985000  | 0.000181000  |
|                |            | 21         | -2.405049000 | 0.000216000  | -1.492402000 |
|                |            | 21         | -2.404690000 | -0.000162000 | 1.492479000  |
|                |            | 21         | 2.496686000  | -1.566128000 | -0.000401000 |

| Isomer         | Spin state | Coordinate |              |              |              |
|----------------|------------|------------|--------------|--------------|--------------|
| <b>c.9.A.1</b> | triplet    | 21         | 1.515035000  | -2.705705000 | -0.575512000 |
|                |            | 21         | 0.752084000  | 0.001558000  | -1.284881000 |
|                |            | 21         | 2.559737000  | 0.003841000  | 0.901869000  |
|                |            | 21         | -0.143022000 | -1.472674000 | 1.394796000  |
|                |            | 21         | -1.621305000 | -1.661374000 | -1.157780000 |
|                |            | 21         | -2.794387000 | -0.004762000 | 1.058579000  |
|                |            | 21         | -1.626768000 | 1.656783000  | -1.157010000 |
|                |            | 21         | -0.147593000 | 1.471512000  | 1.394977000  |
|                |            | 21         | 1.506220000  | 2.710822000  | -0.575037000 |
| <b>n.9.A.1</b> | doublet    | 21         | -0.184509000 | -1.459243000 | 1.376172000  |
|                |            | 21         | -1.633581000 | 1.617014000  | -1.193074000 |
|                |            | 21         | 1.583581000  | 2.664874000  | -0.573533000 |
|                |            | 21         | 0.742232000  | -0.000142000 | -1.251427000 |
|                |            | 21         | 1.582261000  | -2.665565000 | -0.573625000 |
|                |            | 21         | -1.634216000 | -1.616320000 | -1.192972000 |
|                |            | 21         | -2.817752000 | 0.000641000  | 1.085261000  |
|                |            | 21         | -0.183857000 | 1.459271000  | 1.376132000  |
| <b>a.9.A.1</b> | triplet    | 21         | 2.424736000  | 0.828098000  | 0.963863000  |
|                |            | 21         | -1.982163000 | 1.076217000  | -1.216597000 |
|                |            | 21         | 0.764614000  | 0.198144000  | -1.272680000 |
|                |            | 21         | 2.319109000  | -2.122910000 | -0.511488000 |
|                |            | 21         | 0.296128000  | -1.389434000 | 1.367280000  |
|                |            | 21         | -0.683533000 | 1.352942000  | 1.403406000  |
|                |            | 21         | 0.594237000  | 2.988988000  | -0.614526000 |
|                |            | 21         | -2.713284000 | -0.866233000 | 1.057825000  |
|                |            | 21         | -1.019842000 | -2.065813000 | -1.177083000 |

| Isomer          | Spin state | Coordinate |              |              |              |
|-----------------|------------|------------|--------------|--------------|--------------|
| <b>c.10.A.1</b> | octet      | 21         | -0.940898000 | -2.236776000 | -1.078973000 |
|                 |            | 21         | -2.935491000 | -0.006788000 | -0.001649000 |
|                 |            | 21         | -0.952974000 | 2.231691000  | 1.078478000  |
|                 |            | 21         | 1.673938000  | 0.742368000  | 2.116749000  |
|                 |            | 21         | 1.671797000  | 2.120493000  | -0.737203000 |
|                 |            | 21         | -0.945491000 | -1.081171000 | 2.233620000  |
|                 |            | 21         | 1.680296000  | -0.733982000 | -2.115114000 |
|                 |            | 21         | 1.681866000  | -2.112336000 | 0.738631000  |
|                 |            | 21         | -0.948990000 | 1.076652000  | -2.234453000 |
|                 |            | 21         | 0.015948000  | -0.000151000 | -0.000086000 |
| <b>n.10.A.1</b> | quintet    | 21         | -3.389667000 | 0.000012000  | 0.591587000  |
|                 |            | 21         | -1.838716000 | 1.623001000  | -1.413497000 |
|                 |            | 21         | -1.838883000 | -1.622812000 | -1.413680000 |
|                 |            | 21         | -0.862528000 | -1.504509000 | 1.392145000  |
|                 |            | 21         | 1.536467000  | -2.500009000 | -0.208099000 |
|                 |            | 21         | 1.816459000  | 0.000005000  | 1.666747000  |
|                 |            | 21         | 3.411057000  | -0.000009000 | -0.786129000 |
|                 |            | 21         | 1.536411000  | 2.500004000  | -0.208107000 |
|                 |            | 21         | -0.862442000 | 1.504322000  | 1.392293000  |
|                 |            | 21         | 0.491843000  | -0.000004000 | -1.013259000 |
| <b>a.10.A.1</b> | 14-et      | 21         | -0.076133000 | 2.894901000  | -0.171740000 |
|                 |            | 21         | 2.616799000  | 1.603741000  | -1.122779000 |
|                 |            | 21         | -2.697444000 | 1.464028000  | -1.122779000 |
|                 |            | 21         | -1.593428000 | 0.865020000  | 1.589578000  |
|                 |            | 21         | -2.468939000 | -1.513433000 | -0.171495000 |
|                 |            | 21         | 0.047702000  | -1.812301000 | 1.589616000  |
|                 |            | 21         | 0.080645000  | -3.068027000 | -1.122784000 |
|                 |            | 21         | 2.545064000  | -1.381566000 | -0.171498000 |
|                 |            | 21         | 1.545707000  | 0.947581000  | 1.589602000  |
|                 |            | 21         | 0.000027000  | 0.000055000  | -0.885722000 |



| Isomer          | Spin state | Coordinate |              |              |              |
|-----------------|------------|------------|--------------|--------------|--------------|
| <b>c.11.A.1</b> | triplet    | 21         | -0.373102000 | -0.014519000 | -0.000128000 |
|                 |            | 21         | -1.364468000 | 1.803081000  | -1.715520000 |
|                 |            | 21         | 1.397979000  | -2.181426000 | -0.000124000 |
|                 |            | 21         | 1.402575000  | 2.169584000  | 0.000270000  |
|                 |            | 21         | -1.389194000 | -1.796198000 | -1.725720000 |
|                 |            | 21         | 1.400074000  | 0.005274000  | -2.174251000 |
|                 |            | 21         | -3.292289000 | 0.013648000  | -0.000248000 |
|                 |            | 21         | -1.364766000 | 1.802240000  | 1.715837000  |
|                 |            | 21         | 3.572511000  | -0.010754000 | 0.000016000  |
|                 |            | 21         | -1.389343000 | -1.795780000 | 1.725600000  |
|                 |            | 21         | 1.400022000  | 0.004851000  | 2.174267000  |
| <b>n.11.A.1</b> | doublet    | 21         | -1.378955000 | -1.772319000 | 1.727219000  |
|                 |            | 21         | 1.395131000  | -2.175679000 | -0.001346000 |
|                 |            | 21         | 3.560977000  | 0.002624000  | -0.000136000 |
|                 |            | 21         | 1.413146000  | 2.187182000  | 0.001335000  |
|                 |            | 21         | 1.404658000  | -0.006292000 | -2.176376000 |
|                 |            | 21         | -3.243785000 | -0.009133000 | 0.000180000  |
|                 |            | 21         | -1.399434000 | 1.768494000  | 1.727668000  |
|                 |            | 21         | 1.404843000  | -0.009083000 | 2.176197000  |
|                 |            | 21         | -1.379367000 | -1.770176000 | -1.729286000 |
|                 |            | 21         | -1.399719000 | 1.770658000  | -1.725403000 |
|                 |            | 21         | -0.377495000 | 0.013722000  | -0.000053000 |
| <b>a.11.A.1</b> | triplet    | 21         | -3.540724000 | -0.006209000 | 0.000056000  |
|                 |            | 21         | -1.389931000 | 0.003979000  | -2.191213000 |
|                 |            | 21         | -1.378950000 | -2.222356000 | 0.000024000  |
|                 |            | 21         | -1.372934000 | 2.206633000  | 0.000074000  |
|                 |            | 21         | -1.389846000 | 0.003920000  | 2.191175000  |
|                 |            | 21         | 1.343955000  | 1.903676000  | 1.642776000  |
|                 |            | 21         | 1.371360000  | -1.898783000 | 1.622348000  |
|                 |            | 21         | 3.251378000  | 0.015063000  | -0.000237000 |
|                 |            | 21         | 1.371174000  | -1.899265000 | -1.622303000 |
|                 |            | 21         | 1.343795000  | 1.904343000  | -1.642557000 |
|                 |            | 21         | 0.390723000  | -0.011002000 | -0.000142000 |

| Isomer          | Spin state   | Coordinate      |              |              |              |
|-----------------|--------------|-----------------|--------------|--------------|--------------|
| <b>c.12.A.1</b> | 14-et        | 21              | 2.402262000  | -1.297230000 | -1.525029000 |
|                 |              | 21              | 0.488648000  | 2.667836000  | 1.029666000  |
|                 |              | 21              | -1.180841000 | 2.460989000  | -1.525816000 |
|                 |              | 21              | -2.385957000 | 1.289381000  | 1.030124000  |
|                 |              | 21              | -0.491802000 | -2.684779000 | -1.525905000 |
|                 |              | 21              | -0.000051000 | 0.000095000  | 2.704633000  |
|                 |              | 21              | 1.172319000  | -2.445584000 | 1.029880000  |
|                 |              | 21              | -2.706229000 | -0.362082000 | -1.524866000 |
|                 |              | 21              | -1.963067000 | -1.871226000 | 1.030022000  |
|                 |              | 21              | 2.687999000  | 0.359599000  | 1.030318000  |
|                 |              | 21              | 1.976778000  | 1.882812000  | -1.525378000 |
|                 |              | 21              | -0.000059000 | 0.000190000  | -0.227649000 |
|                 |              | <b>n.12.A.1</b> | 13-et        | 21           | 1.272639000  |
| 21              | 0.005036000  |                 |              | 0.010475000  | 2.698981000  |
| 21              | -0.397577000 |                 |              | -2.650191000 | 1.038074000  |
| 21              | 2.408031000  |                 |              | -1.206759000 | 1.027431000  |
| 21              | 1.896301000  |                 |              | 1.928625000  | 1.020066000  |
| 21              | 2.694422000  |                 |              | 0.457834000  | -1.517808000 |
| 21              | 0.404151000  |                 |              | 2.693875000  | -1.523564000 |
| 21              | -1.251253000 |                 |              | 2.393866000  | 1.022351000  |
| 21              | -2.451708000 |                 |              | 1.227375000  | -1.514223000 |
| 21              | -1.928457000 |                 |              | -1.961847000 | -1.518061000 |
| 21              | -2.648234000 |                 |              | -0.450865000 | 1.033456000  |
| 21              | -0.003350000 |                 |              | -0.006320000 | -0.251201000 |
| <b>a.12.A.1</b> | 12-et        |                 |              | 21           | -1.029703000 |
|                 |              | 21              | -1.029549000 | 2.170280000  | -1.576823000 |
|                 |              | 21              | 1.515049000  | 2.758782000  | 0.000000000  |
|                 |              | 21              | 1.514909000  | 0.852496000  | 2.623817000  |
|                 |              | 21              | -1.029549000 | 2.170280000  | 1.576823000  |
|                 |              | 21              | 1.514909000  | 0.852496000  | -2.623817000 |
|                 |              | 21              | 1.514909000  | -2.231978000 | 1.621526000  |
|                 |              | 21              | 1.514909000  | -2.231978000 | -1.621526000 |
|                 |              | 21              | -1.029703000 | -0.829062000 | -2.551214000 |
|                 |              | 21              | 0.272575000  | 0.000108000  | 0.000000000  |
|                 |              | 21              | -1.029768000 | -2.682518000 | 0.000000000  |
|                 |              | 21              | -2.698987000 | 0.000155000  | 0.000000000  |

| Isomer          | Spin state   | Coordinate      |              |              |              |
|-----------------|--------------|-----------------|--------------|--------------|--------------|
| <b>c.13.A.1</b> | 19-et        | 21              | 1.871993000  | -0.040463000 | -2.387092000 |
|                 |              | 21              | 1.542510000  | 2.533698000  | -0.592352000 |
|                 |              | 21              | 2.946655000  | -0.074110000 | 0.557131000  |
|                 |              | 21              | 1.416050000  | -2.605131000 | -0.603831000 |
|                 |              | 21              | -0.002049000 | 0.000128000  | -0.054649000 |
|                 |              | 21              | -1.007146000 | -1.611074000 | -2.366858000 |
|                 |              | 21              | 0.904593000  | -1.626999000 | 2.381823000  |
|                 |              | 21              | -1.826123000 | 0.039946000  | 2.407473000  |
|                 |              | 21              | -2.973215000 | 0.074794000  | -0.560114000 |
|                 |              | 21              | -1.403185000 | 2.582393000  | 0.601350000  |
|                 |              | 21              | 0.984017000  | 1.570505000  | 2.388131000  |
|                 |              | 21              | -1.528947000 | -2.512454000 | 0.590218000  |
|                 |              | 21              | -0.925153000 | 1.668767000  | -2.361231000 |
|                 |              | <b>n.13.A.1</b> | 20-et        | 21           | 1.438503000  |
| 21              | 1.262555000  |                 |              | -1.795633000 | 2.060055000  |
| 21              | -1.336479000 |                 |              | -2.655976000 | 0.471240000  |
| 21              | -1.199459000 |                 |              | -1.349735000 | -2.408535000 |
| 21              | 0.000081000  |                 |              | -0.000002000 | 0.000143000  |
| 21              | 1.484145000  |                 |              | 0.317818000  | -2.599592000 |
| 21              | -3.005902000 |                 |              | -0.042311000 | -0.162167000 |
| 21              | -1.438551000 |                 |              | 2.433396000  | 1.035154000  |
| 21              | 1.336448000  |                 |              | 2.655987000  | -0.471309000 |
| 21              | 1.199465000  |                 |              | 1.349803000  | 2.408583000  |
| 21              | -1.484215000 |                 |              | -0.317822000 | 2.599595000  |
| 21              | -1.262536000 |                 |              | 1.795543000  | -2.060041000 |
| 21              | 3.005944000  |                 |              | 0.042312000  | 0.162117000  |
| <b>a.13.A.1</b> | 19-et        |                 |              | 21           | -1.587558862 |
|                 |              | 21              | -2.559630523 | 0.000000000  | 1.569746322  |
|                 |              | 21              | 0.000000000  | -1.589153903 | 2.566961464  |
|                 |              | 21              | 0.000000000  | 1.589153903  | -2.566961464 |
|                 |              | 21              | 1.587558862  | -2.555177126 | 0.000000000  |
|                 |              | 21              | 0.000000000  | 1.589153903  | 2.566961464  |
|                 |              | 21              | 2.559630523  | 0.000000000  | 1.569746322  |
|                 |              | 21              | 1.587558862  | 2.555177126  | 0.000000000  |
|                 |              | 21              | 2.559630523  | 0.000000000  | -1.569746322 |
|                 |              | 21              | -2.559630523 | 0.000000000  | -1.569746322 |
|                 |              | 21              | -1.587558862 | -2.555177126 | 0.000000000  |
|                 |              | 21              | 0.000000000  | -1.589153903 | -2.566961464 |
|                 |              | 21              | 0.000000000  | 0.000000000  | 0.000000000  |

Coordinates of the lowest-lying Sc<sub>n-1</sub>B<sup>+0/-</sup> clusters.

| Isomer  | Spin state | Coordinate |             |             |              |
|---------|------------|------------|-------------|-------------|--------------|
| c.1.B.1 | quartet    | 21         | 0.000000000 | 0.000000000 | 0.405933000  |
|         |            | 5          | 0.000000000 | 0.000000000 | -1.704920000 |
| n.1.B.1 | quintet    | 21         | 0.000000000 | 0.000000000 | 0.403846000  |
|         |            | 5          | 0.000000000 | 0.000000000 | -1.696154000 |
| a.1.B.1 | quartet    | 21         | 0.000000000 | 0.000000000 | 0.417786000  |
|         |            | 5          | 0.000000000 | 0.000000000 | -1.754701000 |

| Isomer  | Spin state | Coordinate |              |              |              |
|---------|------------|------------|--------------|--------------|--------------|
| c.2.B.1 | singlet    | 21         | 0.000000000  | 0.000000000  | 2.002332000  |
|         |            | 21         | 0.000000000  | 0.000000000  | -2.002332000 |
|         |            | 5          | 0.000000000  | 0.000000000  | 0.000000000  |
| n.2.B.1 | doublet    | 21         | 0.000000000  | 1.375316000  | 0.000000000  |
|         |            | 21         | -0.330463000 | -1.335026000 | 0.000000000  |
|         |            | 5          | 1.387943000  | -0.169220000 | 0.000000000  |
| a.2.B.1 | singlet    | 21         | -1.436770000 | -0.159603000 | 0.000000000  |
|         |            | 21         | 1.436770000  | -0.159603000 | 0.000000000  |
|         |            | 5          | 0.000000000  | 1.340664000  | 0.000000000  |

| Isomer  | Spin state | Coordinate |              |              |              |
|---------|------------|------------|--------------|--------------|--------------|
| c.3.B.1 | doublet    | 21         | -1.568768000 | -0.832588000 | 0.091938000  |
|         |            | 21         | -0.000628000 | 1.687595000  | 0.075548000  |
|         |            | 21         | 1.569374000  | -0.831590000 | 0.091947000  |
|         |            | 5          | 0.000088000  | -0.098349000 | -1.089616000 |
| n.3.B.1 | triplet    | 21         | -1.154549000 | 1.261025000  | -0.095068000 |
|         |            | 21         | -0.514851000 | -1.630341000 | -0.095068000 |
|         |            | 21         | 1.669394000  | 0.369315000  | -0.095073000 |
|         |            | 5          | 0.000024000  | 0.000004000  | 1.197877000  |
| a.3.B.1 | quartet    | 21         | 0.000000000  | 1.693674000  | -0.099691000 |
|         |            | 21         | -1.466765000 | -0.846837000 | -0.099691000 |
|         |            | 21         | 1.466765000  | -0.846837000 | -0.099691000 |
|         |            | 5          | 0.000000000  | 0.000000000  | 1.256102000  |

| Isomer  | Spin state | Coordinate |              |              |              |
|---------|------------|------------|--------------|--------------|--------------|
| c.4.B.1 | quintet    | 21         | -0.594201000 | 2.187054000  | 0.000000000  |
|         |            | 21         | -0.594201000 | -0.348185000 | 1.573249000  |
|         |            | 21         | 1.617627000  | -1.587355000 | 0.000000000  |
|         |            | 21         | -0.594201000 | -0.348185000 | -1.573249000 |
|         |            | 5          | 0.692901000  | 0.406017000  | 0.000000000  |
| n.4.B.1 | sextet     | 21         | -0.000067000 | 1.496838000  | -0.706904000 |
|         |            | 21         | 2.192014000  | -0.000118000 | 0.597182000  |
|         |            | 21         | -2.192004000 | -0.000222000 | 0.597168000  |
|         |            | 21         | 0.000084000  | -1.496541000 | -0.707155000 |
|         |            | 5          | -0.000116000 | 0.000177000  | 0.922778000  |
| a.4.B.1 | quintet    | 21         | 0.588825045  | -2.210078157 | 0.000000000  |
|         |            | 21         | 0.588825045  | 0.319339023  | 1.501812108  |
|         |            | 21         | -1.573431115 | 1.674884120  | 0.000000000  |
|         |            | 21         | 0.588825045  | 0.319339023  | -1.501812108 |
|         |            | 5          | -0.810783060 | -0.434631031 | 0.000000000  |

| Isomer         | Spin state | Coordinate |              |              |              |
|----------------|------------|------------|--------------|--------------|--------------|
| <b>c.5.B.1</b> | octet      | 21         | -1.695179000 | -1.423486000 | -0.451309000 |
|                |            | 21         | -1.540827000 | 1.552168000  | -0.282387000 |
|                |            | 21         | 1.695100000  | -1.423565000 | -0.451360000 |
|                |            | 21         | 1.540937000  | 1.552066000  | -0.282301000 |
|                |            | 21         | -0.000030000 | -0.251659000 | 1.639107000  |
|                |            | 5          | -0.000004000 | -0.023206000 | -0.721347000 |
| <b>n.5.B.1</b> | singlet    | 21         | 2.056130000  | -0.373037000 | 0.000000000  |
|                |            | 21         | 0.000000000  | -0.373022000 | 2.056131000  |
|                |            | 21         | -2.056130000 | -0.373028000 | 0.000000000  |
|                |            | 21         | 0.000000000  | -0.373022000 | -2.056131000 |
|                |            | 21         | 0.000000000  | 1.802414000  | 0.000000000  |
|                |            | 5          | -0.000002000 | -1.303279000 | 0.000000000  |
| <b>a.5.B.1</b> | octet      | 21         | 1.616509000  | 1.496268000  | 0.375491000  |
|                |            | 21         | -1.617367000 | 1.495552000  | 0.375307000  |
|                |            | 21         | -1.616533000 | -1.496211000 | 0.375155000  |
|                |            | 21         | 1.616982000  | -1.495718000 | 0.375521000  |
|                |            | 21         | 0.000433000  | 0.000092000  | -1.660735000 |
|                |            | 5          | -0.000103000 | 0.000074000  | 0.668896000  |

| Isomer         | Spin state  | Coordinate   |              |              |              |
|----------------|-------------|--------------|--------------|--------------|--------------|
| <b>c.6.B.1</b> | nonet       | 21           | 1.332383000  | -0.430791000 | -1.694224000 |
|                |             | 21           | 1.330788000  | -1.251408000 | 1.222179000  |
|                |             | 21           | -1.325301000 | 1.279866000  | -1.249493000 |
|                |             | 21           | 1.329365000  | 1.684446000  | 0.474487000  |
|                |             | 21           | -1.324058000 | -1.722766000 | -0.485254000 |
|                |             | 21           | -1.326704000 | 0.440753000  | 1.732363000  |
|                |             | 5            | -0.069189000 | -0.000420000 | -0.000243000 |
| <b>n.6.B.1</b> | octet       | 21           | -0.000005000 | 0.056264000  | 2.202944000  |
|                |             | 21           | -1.467466000 | 1.623413000  | 0.000000000  |
|                |             | 21           | 1.485321000  | -1.669130000 | 0.000000000  |
|                |             | 21           | 1.466782000  | 1.624032000  | 0.000000000  |
|                |             | 21           | -1.484625000 | -1.669761000 | 0.000000000  |
|                |             | 21           | -0.000005000 | 0.056264000  | -2.202944000 |
|                |             | 5            | -0.000005000 | -0.088549000 | 0.000000000  |
| <b>a.6.B.1</b> | septet      | 21           | 1.266439000  | 1.807870000  | -0.094884000 |
|                |             | 21           | 1.280353000  | -0.801352000 | 1.612389000  |
|                |             | 21           | 1.294553000  | -0.976035000 | -1.501111000 |
|                |             | 21           | -1.295702000 | 1.078329000  | 1.428398000  |
|                |             | 21           | -1.267148000 | -1.796433000 | 0.220714000  |
|                |             | 21           | -1.278533000 | 0.687637000  | -1.665550000 |
| 5              | 0.000158000 | -0.000064000 | 0.000189000  |              |              |

| Isomer         | Spin state | Coordinate |              |              |              |
|----------------|------------|------------|--------------|--------------|--------------|
| <b>c.7.B.1</b> | octet      | 21         | 0.379907000  | 2.367838000  | -0.000057000 |
|                |            | 21         | -0.000866000 | 0.000204000  | -2.174364000 |
|                |            | 21         | -1.699166000 | -1.692631000 | 0.000263000  |
|                |            | 21         | 0.000508000  | -0.000275000 | 2.174277000  |
|                |            | 21         | 1.084721000  | -2.138943000 | -0.000482000 |
|                |            | 21         | 2.369685000  | 0.370651000  | -0.000270000 |
|                |            | 21         | -2.134830000 | 1.093196000  | 0.000634000  |
|                |            | 5          | 0.000172000  | -0.000167000 | -0.000007000 |
| <b>n.7.B.1</b> | septet     | 21         | -0.053574000 | -0.000309000 | 2.173796000  |
|                |            | 21         | -1.941919000 | 1.369181000  | 0.000052000  |
|                |            | 21         | -1.919679000 | -1.398846000 | -0.000028000 |
|                |            | 21         | -0.053605000 | -0.000203000 | -2.173814000 |
|                |            | 21         | 0.779941000  | -2.250631000 | -0.000023000 |
|                |            | 21         | 0.744386000  | 2.261999000  | 0.000030000  |
|                |            | 21         | 2.414633000  | 0.018641000  | -0.000011000 |
|                |            | 5          | 0.125230000  | 0.000705000  | -0.000010000 |
| <b>a.7.B.1</b> | octet      | 21         | -2.049346000 | 1.229534000  | 0.000004000  |
|                |            | 21         | -1.862038000 | -1.491997000 | 0.000131000  |
|                |            | 21         | 0.832162000  | -2.214723000 | 0.000109000  |
|                |            | 21         | 0.101971000  | -0.004378000 | -2.194100000 |
|                |            | 21         | 2.386632000  | 0.175253000  | -0.000118000 |
|                |            | 21         | 0.505313000  | 2.309892000  | -0.000141000 |
|                |            | 21         | 0.102205000  | -0.004023000 | 2.194105000  |
|                |            | 5          | -0.070974000 | 0.001856000  | 0.000040000  |

| Isomer         | Spin state | Coordinate |              |              |              |
|----------------|------------|------------|--------------|--------------|--------------|
| <b>c.8.B.1</b> | triplet    | 21         | -1.505645000 | -1.604669000 | -1.193381000 |
|                |            | 21         | 1.505864000  | -1.604751000 | -1.193197000 |
|                |            | 21         | 1.501422000  | 1.603913000  | -1.192520000 |
|                |            | 21         | 2.582965000  | -0.019447000 | 0.999123000  |
|                |            | 21         | -1.501209000 | 1.603806000  | -1.192727000 |
|                |            | 21         | -0.000124000 | 1.570147000  | 1.428107000  |
|                |            | 21         | -0.000131000 | -1.530441000 | 1.442267000  |
|                |            | 5          | -2.583180000 | -0.019433000 | 0.998920000  |
| <b>n.8.B.1</b> | doublet    | 21         | 0.000158000  | 0.003673000  | -0.405683000 |
|                |            | 21         | -2.086245000 | 0.666459000  | 0.000000000  |
|                |            | 21         | -0.000005000 | 2.195777000  | 1.519259000  |
|                |            | 21         | 1.436120000  | -2.184237000 | 0.000000000  |
|                |            | 21         | -1.436092000 | -2.184265000 | 0.000000000  |
|                |            | 21         | -0.000005000 | 2.195777000  | -1.519259000 |
|                |            | 21         | -0.000005000 | -0.654299000 | -2.227716000 |
|                |            | 21         | -0.000005000 | -0.654299000 | 2.227716000  |
| <b>a.8.B.1</b> | triplet    | 21         | 2.086239000  | 0.666473000  | 0.000000000  |
|                |            | 5          | 0.000000000  | -0.199019000 | 0.000000000  |
|                |            | 21         | -2.147441000 | -0.086657000 | 1.479189000  |
|                |            | 21         | 0.672051000  | -0.006876000 | -2.178326000 |
|                |            | 21         | 2.045300000  | 1.576192000  | 0.000813000  |
|                |            | 21         | 0.672530000  | -0.009560000 | 2.178235000  |
|                |            | 21         | -0.556055000 | -2.200927000 | -0.001316000 |
|                |            | 21         | -2.147909000 | -0.084972000 | -1.478845000 |
| <b>a.8.B.1</b> | triplet    | 21         | 2.256623000  | -1.365808000 | -0.001029000 |
|                |            | 21         | -0.791061000 | 2.178155000  | 0.001278000  |
|                |            | 5          | -0.016965000 | 0.001903000  | 0.000008000  |

| Isomer         | Spin state | Coordinate |              |              |              |
|----------------|------------|------------|--------------|--------------|--------------|
| <b>c.9.B.1</b> | doublet    | 21         | -0.001064000 | -1.759164000 | -1.558603000 |
|                |            | 21         | -2.562464000 | -1.421405000 | -0.017611000 |
|                |            | 21         | -1.528424000 | 0.889771000  | -1.595000000 |
|                |            | 21         | 1.529456000  | 0.888004000  | -1.595092000 |
|                |            | 21         | 0.001753000  | 2.889722000  | 0.023959000  |
|                |            | 21         | 2.560729000  | -1.424376000 | -0.017645000 |
|                |            | 21         | 1.530486000  | 0.857951000  | 1.603153000  |
|                |            | 21         | -1.529448000 | 0.859768000  | 1.603085000  |
|                |            | 21         | -0.001048000 | -1.788996000 | 1.553564000  |
|                |            | 5          | 0.000106000  | 0.036646000  | 0.000796000  |
| <b>n.9.B.1</b> | triplet    | 21         | 1.590123000  | 2.626289000  | 0.000000000  |
|                |            | 21         | -0.807676000 | 1.537555000  | 1.496177000  |
|                |            | 21         | 1.750742000  | -0.022736000 | 1.504189000  |
|                |            | 21         | 1.750742000  | -0.022736000 | -1.504189000 |
|                |            | 21         | -0.807676000 | 1.537555000  | -1.496177000 |
|                |            | 21         | -0.807676000 | -1.305411000 | -2.258427000 |
|                |            | 21         | 0.692413000  | -2.466290000 | 0.000000000  |
|                |            | 21         | -0.807676000 | -1.305411000 | 2.258427000  |
|                |            | 21         | -2.515813000 | -0.517775000 | 0.000000000  |
|                |            | 5          | -0.157503000 | -0.256366000 | 0.000000000  |
| <b>a.9.B.1</b> | quartet    | 21         | 0.881103000  | -0.052292000 | -2.105217000 |
|                |            | 21         | 0.881096000  | 0.052601000  | 2.105210000  |
|                |            | 21         | -1.633407000 | 1.526246000  | 1.452181000  |
|                |            | 21         | -1.632465000 | -1.452457000 | 1.526589000  |
|                |            | 21         | -1.632454000 | -1.526712000 | -1.452358000 |
|                |            | 21         | 0.881234000  | -2.105566000 | 0.052463000  |
|                |            | 21         | 3.100002000  | 0.000684000  | -0.000015000 |
|                |            | 21         | 0.880734000  | 2.105521000  | -0.052454000 |
|                |            | 21         | -1.633407000 | 1.451995000  | -1.526399000 |
|                |            | 5          | -0.388233000 | -0.000084000 | 0.000001000  |

| Isomer          | Spin state   | Coordinate      |              |              |              |
|-----------------|--------------|-----------------|--------------|--------------|--------------|
| <b>c.10.B.1</b> | septet       | 21              | -1.281929000 | 1.489121000  | 1.487616000  |
|                 |              | 21              | -1.281938000 | 1.487626000  | -1.489114000 |
|                 |              | 21              | 1.281925000  | -0.001021000 | -2.104894000 |
|                 |              | 21              | -1.281940000 | -1.489098000 | -1.487638000 |
|                 |              | 21              | 3.491863000  | 0.000024000  | -0.000012000 |
|                 |              | 21              | -1.281929000 | -1.487628000 | 1.489110000  |
|                 |              | 21              | 1.281931000  | 0.000994000  | 2.104899000  |
|                 |              | 21              | 1.281944000  | -2.104934000 | 0.001013000  |
|                 |              | 21              | 1.281940000  | 2.104920000  | -0.000999000 |
|                 |              | 21              | -3.491880000 | 0.000000000  | 0.000017000  |
|                 |              | 5               | 0.000054000  | -0.000014000 | 0.000004000  |
|                 |              | <b>n.10.B.1</b> | doublet      | 21           | 1.279337000  |
| 21              | 3.523437000  |                 |              | -0.000127000 | 0.021985000  |
| 21              | -1.302741000 |                 |              | 0.001460000  | -2.098241000 |
| 21              | -1.259698000 |                 |              | -2.081919000 | 0.012029000  |
| 21              | -1.326422000 |                 |              | -0.001411000 | 2.101397000  |
| 21              | 1.279316000  |                 |              | -1.484182000 | 1.453482000  |
| 21              | -3.520770000 |                 |              | 0.000007000  | -0.025349000 |
| 21              | -1.259697000 |                 |              | 2.081831000  | 0.014954000  |
| 21              | 1.295094000  |                 |              | -1.490654000 | -1.468320000 |
| 21              | 1.295164000  |                 |              | 1.492937000  | -1.466134000 |
| 5               | -0.012688000 |                 |              | -0.000041000 | -0.005778000 |
| <b>a.10.B.1</b> | quintet      |                 |              | 21           | -1.275265000 |
|                 |              | 21              | -3.534487000 | 0.000035000  | -0.000005000 |
|                 |              | 21              | -1.275243000 | 1.519548000  | -1.438603000 |
|                 |              | 21              | -1.275276000 | -1.438622000 | -1.519539000 |
|                 |              | 21              | 1.275256000  | 0.057113000  | -2.091676000 |
|                 |              | 21              | 1.275234000  | -2.091711000 | -0.057138000 |
|                 |              | 21              | -1.275239000 | 1.438616000  | 1.519552000  |
|                 |              | 21              | 1.275274000  | -0.057141000 | 2.091663000  |
|                 |              | 21              | 1.275251000  | 2.091698000  | 0.057113000  |
|                 |              | 21              | 3.534524000  | 0.000014000  | 0.000005000  |
|                 |              | 5               | -0.000125000 | -0.000004000 | -0.000003000 |



| Isomer          | Spin state   | Coordinate      |              |              |              |
|-----------------|--------------|-----------------|--------------|--------------|--------------|
| <b>c.11.B.1</b> | sextet       | 21              | 1.497614000  | -0.351821000 | 2.073920000  |
|                 |              | 21              | -0.162913000 | 2.112840000  | 1.490569000  |
|                 |              | 21              | -1.422621000 | -0.530377000 | 1.609954000  |
|                 |              | 21              | -3.312117000 | -1.893422000 | -0.003359000 |
|                 |              | 21              | 0.399635000  | -2.236058000 | 0.006683000  |
|                 |              | 21              | -2.890823000 | 1.447900000  | 0.006798000  |
|                 |              | 21              | -1.418964000 | -0.526078000 | -1.613131000 |
|                 |              | 21              | 3.457700000  | -1.357678000 | 0.009327000  |
|                 |              | 21              | 2.434588000  | 1.540328000  | -0.006436000 |
|                 |              | 21              | -0.160657000 | 2.110297000  | -1.498723000 |
|                 |              | 21              | 1.500296000  | -0.370994000 | -2.074928000 |
|                 |              | 5               | 0.328700000  | 0.231265000  | -0.002835000 |
|                 |              | <b>n.11.B.1</b> | triplet      | 21           | -1.501870000 |
| 21              | -1.497629000 |                 |              | -0.358536000 | -2.080960000 |
| 21              | 0.179535000  |                 |              | 2.104566000  | -1.454542000 |
| 21              | 1.399102000  |                 |              | -0.551457000 | -1.602387000 |
| 21              | 0.169284000  |                 |              | 2.112852000  | 1.442318000  |
| 21              | 3.363602000  |                 |              | -1.843155000 | 0.001309000  |
| 21              | -0.452205000 |                 |              | -2.235040000 | 0.006446000  |
| 21              | 2.920541000  |                 |              | 1.386818000  | 0.000594000  |
| 21              | 1.392687000  |                 |              | -0.534674000 | 1.612045000  |
| 21              | -3.475730000 |                 |              | -1.329342000 | -0.003890000 |
| 21              | -2.416091000 |                 |              | 1.553529000  | -0.003490000 |
| 5               | -0.341158000 |                 |              | 0.204486000  | -0.000519000 |
| <b>a.11.B.1</b> | quartet      |                 |              | 21           | -1.423125000 |
|                 |              | 21              | -1.423129000 | -0.507231000 | -1.676809000 |
|                 |              | 21              | -0.111692000 | 2.121533000  | -1.505220000 |
|                 |              | 21              | 1.495614000  | -0.367101000 | -2.055988000 |
|                 |              | 21              | -0.111694000 | 2.121528000  | 1.505226000  |
|                 |              | 21              | 3.429735000  | -1.413485000 | 0.000006000  |
|                 |              | 21              | 0.341699000  | -2.231877000 | -0.000005000 |
|                 |              | 21              | 2.452412000  | 1.516138000  | -0.000005000 |
|                 |              | 21              | 1.495615000  | -0.367099000 | 2.055985000  |
|                 |              | 21              | -3.330825000 | -1.767629000 | 0.000002000  |
|                 |              | 21              | -2.883492000 | 1.346698000  | 0.000001000  |
|                 |              | 5               | 0.289308000  | 0.234187000  | -0.000002000 |

| Isomer          | Spin state   | Coordinate      |              |              |              |
|-----------------|--------------|-----------------|--------------|--------------|--------------|
| <b>c.12.B.1</b> | triplet      | 21              | -3.989552000 | -0.274172000 | -0.039838000 |
|                 |              | 21              | -1.334410000 | -0.253887000 | -1.525369000 |
|                 |              | 21              | -2.316435000 | 2.284651000  | 0.012308000  |
|                 |              | 21              | -1.359064000 | -0.268549000 | 1.487447000  |
|                 |              | 21              | -2.467635000 | -2.677647000 | 0.030490000  |
|                 |              | 21              | 0.618650000  | -2.145693000 | -0.049756000 |
|                 |              | 21              | 1.702331000  | -0.475738000 | 2.106776000  |
|                 |              | 21              | 1.751972000  | -0.375154000 | -2.116959000 |
|                 |              | 21              | 3.614690000  | -1.614161000 | -0.005218000 |
|                 |              | 21              | 0.385406000  | 2.195504000  | 1.478735000  |
|                 |              | 21              | 2.842755000  | 1.315444000  | 0.034467000  |
|                 |              | 21              | 0.399874000  | 2.224461000  | -1.413532000 |
|                 |              | 5               | 0.635967000  | 0.272752000  | 0.001894000  |
|                 |              | <b>n.12.B.1</b> | doublet      | 21           | 3.974150000  |
| 21              | 2.309986000  |                 |              | 2.289225000  | -0.000023000 |
| 21              | 2.551041000  |                 |              | -2.646297000 | -0.000223000 |
| 21              | 1.329356000  |                 |              | -0.267765000 | -1.505639000 |
| 21              | 1.328821000  |                 |              | -0.267126000 | 1.505900000  |
| 21              | -1.734539000 |                 |              | -0.429367000 | -2.090136000 |
| 21              | -3.595432000 |                 |              | -1.632389000 | 0.000279000  |
| 21              | -0.409929000 |                 |              | 2.189124000  | 1.436034000  |
| 21              | -2.876237000 |                 |              | 1.336028000  | -0.000688000 |
| 21              | -0.409396000 |                 |              | 2.188284000  | -1.437155000 |
| 21              | -1.735115000 |                 |              | -0.427936000 | 2.090325000  |
| 21              | -0.574517000 |                 |              | -2.195294000 | 0.000731000  |
| 5               | -0.664394000 |                 |              | 0.240474000  | -0.000003000 |
| <b>a.12.B.1</b> | triplet      |                 |              | 21           | 2.751255000  |
|                 |              | 21              | 2.751529000  | 1.785248000  | -0.411923000 |
|                 |              | 21              | 2.751061000  | -0.535558000 | 1.751996000  |
|                 |              | 21              | 0.538619000  | 0.561781000  | -1.836170000 |
|                 |              | 21              | -0.727085000 | 2.852529000  | -0.658503000 |
|                 |              | 21              | -0.726397000 | -1.995995000 | -2.141061000 |
|                 |              | 21              | -2.483390000 | 0.518123000  | -1.694688000 |
|                 |              | 21              | -2.482449000 | -1.727686000 | 0.398783000  |
|                 |              | 21              | -2.482606000 | 1.208494000  | 1.296603000  |
|                 |              | 21              | -0.725996000 | -0.856058000 | 2.799326000  |
|                 |              | 21              | 0.538789000  | -1.871319000 | 0.431652000  |
|                 |              | 21              | 0.538319000  | 1.310006000  | 1.404284000  |
|                 |              | 5               | -1.014924000 | -0.000218000 | -0.000150000 |
